# Supplementary material
Source: ML conference proceedings conference paper supplement (https://openaccess.thecvf.com/content/ICCV2021/html/Zakharkin_Point-Based_Modeling_of_ICCV_2021_paper.html)
Supplement: Supplementary file 2 [file Zakharkin_Point-Based_Modeling_of_ICCV_2021_supplemental.zip]

Archive with 4 entries (4 files):
- 08840-supp-text.pdf
- __MACOSX/._08840-supp-text.pdf
- 08840-supp-video.mp4
- __MACOSX/._08840-supp-video.mp4
